# Supplementary material for: Proteomic and Systems Biology Analysis of Monocytes Exposed to Securinine, a GABAA Receptor Antagonist and Immune Adjuvant
Source: PLOS journal article supplement (doi:10.1371/journal.pone.0041278), 2012-09-13
Supplement: S3 (10.1371/journal.pone.0041278.s003) [file journal.pone.0041278.s003]

# Supplemental figure 1
